# Supplementary material for: RNF138-mediated ubiquitination of rpS3 is required for resistance of glioblastoma cells to radiation-induced apoptosis
Source: PubMed Central journal article supplement — Exp Mol Med. 2018 Jan 26;50(1):e434–. doi: 10.1038/emm.2017.247 (PMC5799804; doi:10.1038/emm.2017.247), 2018-01-26
Supplement: emm2017247x4.pdf [file emm2017247x4.pdf]

## Supplementary Figure 1

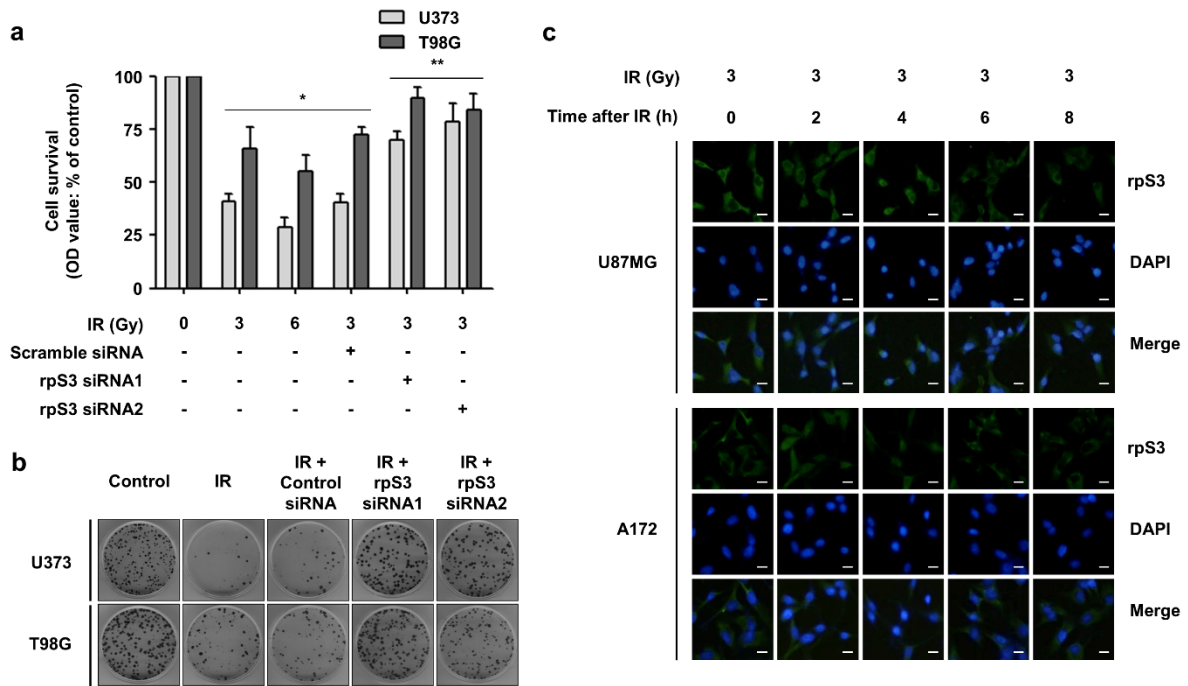

**Supplementary Figure S1** Knockdown of rpS3 enhances the resistance of GBM cells to irradiation. **(a)** Short-term effects of rpS3 knockdown on cell growth in other GBM cell lines, U373 and T98G cells, following radiation exposure were assessed with an MTT assay. \* $p < 0.05$  vs. non-irradiated cells, \*\* $p < 0.05$  vs. irradiated cells treated with/without scramble siRNA. **(b)** Long-term effects of rpS3 knockdown on cell growth in U373 and T98G cells following radiation exposure were assessed with a colony forming assay. **(c)** Radiation-induced translocation of rpS3 from the cytoplasm to the nucleus in a time-dependent manner (0, 2, 4, 6, and 8 h) was assessed by IF staining. Scale bars, 25 $\mu$ m.

**Supplementary Figure 2**

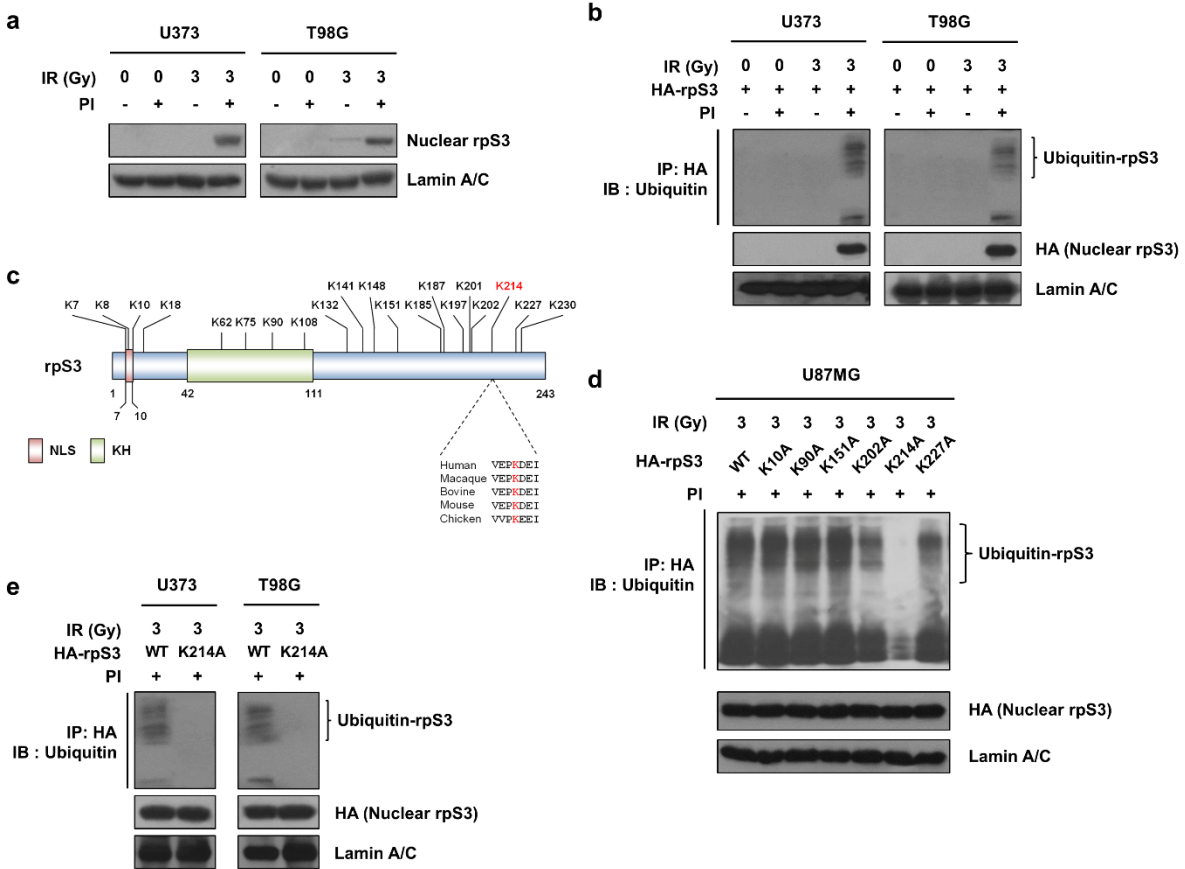

**Supplementary Figure S2** Poly-ubiquitination is required for degradation of rpS3 in irradiated GBM cells. (a) The effects of proteasome inhibition on the protein stability of nuclear rpS3 in U373 and T98 cells were measured by Western blotting. (b) The accumulation of poly-ubiquitinated nuclear rpS3 in response to radiation was measured. U373 and T98G cells expressing HA-rpS3 were treated with or without PI. (c) Schematic presentation for 20 Lys residues of rpS3, which are targets for ubiquitination. (d) The identification of specific Lys residues on the poly-ubiquitination of rpS3 in response to irradiation was measured using six rpS3 mutants (K10A, K90A, K151A, K202A, K214A, or K227A). (e) The effects of Lys214 residue on the poly-ubiquitination of rpS3 were measured. U373 and T98G cells expressing rpS3 WT or K214A were treated with PI.

**Supplementary Figure 3**

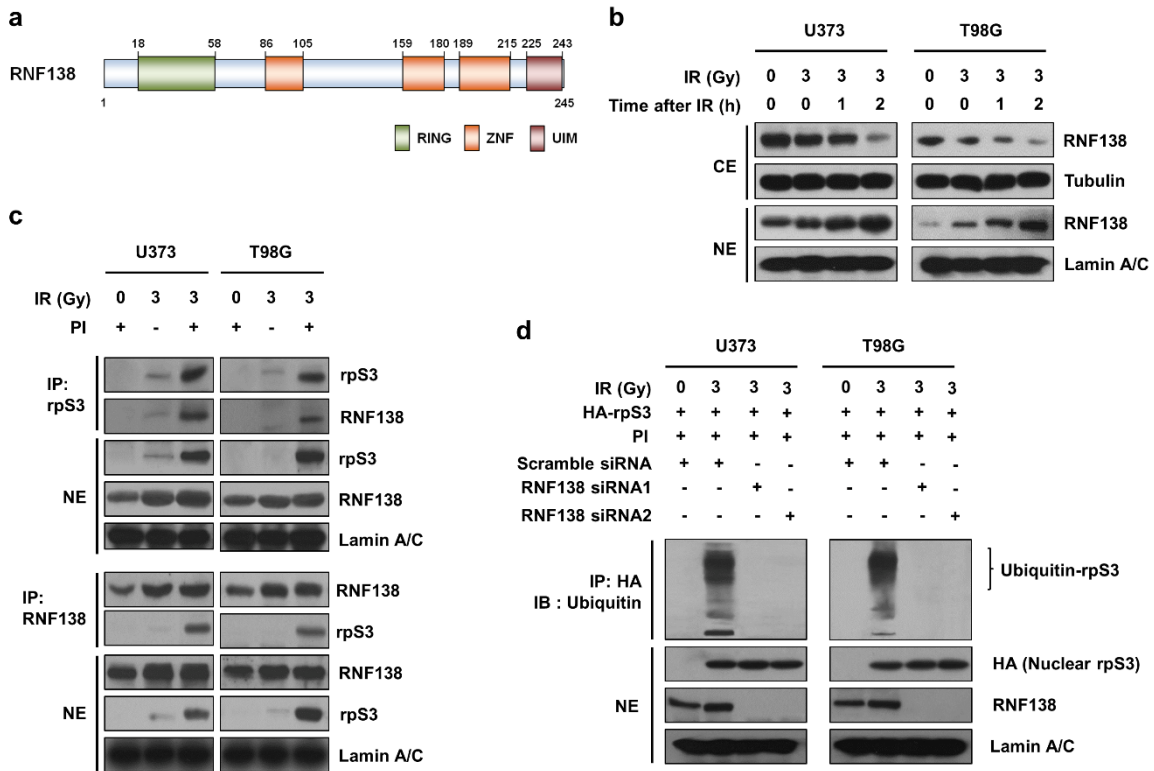

**Supplementary Figure S3** Rps3 is ubiquitinated by RNF138 in response to radiation. **(a)** Schematic presentation for motifs and domains of RNF138 consisting of RING domain, ZNF motifs, and UIM domain. **(b)** Radiation-induced translocation of RNF138 from the cytoplasm to the nucleus of U373 and T98G cells was assessed by Western blotting after cytoplasmic or nuclear fractionation. **(c)** Rps3-RNF138 interaction in the nucleus of U373 and T98G cells after treatment of PI and irradiation was monitored by a reciprocal IP assay. **(d)** The effects of RNF138 knockdown on the ubiquitination of rpS3 in U373 and T98G cells were measured.

#### Supplementary Figure 4

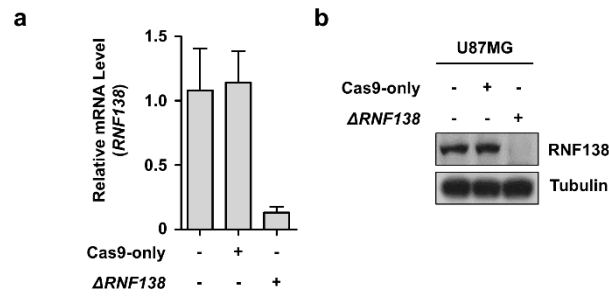

**Supplementary Figure S4** The knockdown efficacy of RNF138 in  $\Delta RNF138$  U87MG cells was verified. (a) U87MG cells were treated with inactive control gRNA/Cas9 (Cas9-only) or RNF138-targeting gRNA/Cas9 ( $\Delta RNF138$ ). The mRNA levels of *RNF138* were measured to confirm the knockdown efficacy of RNF138 in  $\Delta RNF138$  U87MG cells generated by the CRISPR/Cas9 system. (b) The protein levels of RNF138 were measured to confirm the knockdown efficacy of RNF138 in  $\Delta RNF138$  U87MG cells generated by the CRISPR/Cas9 system.

## Supplementary Figure 5

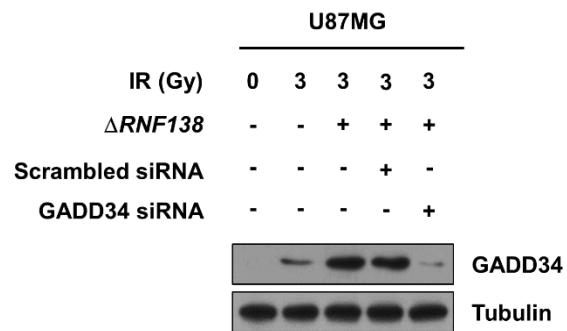

**Supplementary Figure S5** The knockdown efficacy of GADD34 siRNA in  $\Delta RNF138$

U87MG cells was verified by Western blotting.

### Supplementary Figure 6

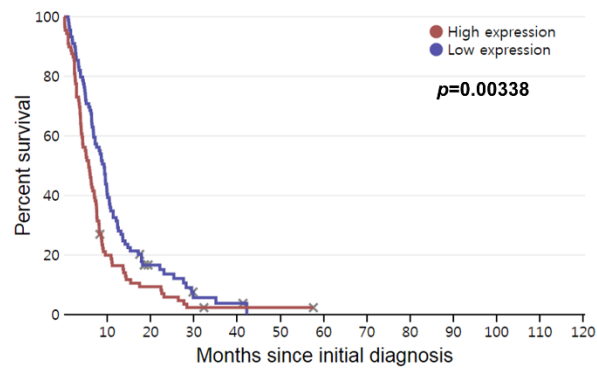

**Supplementary Figure S6** The prognostic value of RNF138 in GBM patients obtained from Betastasis database. It indicated that RNF138-positive (high levels) patients showed poor prognosis than RNF138-negative (low levels) patients ( $p$ -value = 0.00338).
